# Supplementary material for: Identification of specific metabolic pathways as druggable targets regulating the sensitivity to cyanide poisoning
Source: PLoS One. 2018 Jun 7;13(6):e0193889. doi: 10.1371/journal.pone.0193889 (PMC5991913; doi:10.1371/journal.pone.0193889)
Supplement: S4 Dataset — Raw dose-response data of 7 dpf zebrafish larvae exposed for 24h to 20 μM KCN together with the indicated dose of the hit compound being tested. Each column of survival data represents a separate experiment (N = 3–8 zebrafish per dose per experiment). (XLS) [file pone.0193889.s008.xls]

## Sheet: Hit compounds
Survival of 7 dpf zebrafish larvae exposed to 20 µM KCN for 24h together with hit compounds identified in focused screen (Fig. 5)
Summary of separate dose-response experiments (by column, N=3-8 per group)
Sodium glyoxylate
Dose	Survival after 24h									Total N/dose
500 nM							0		0	12
1 µM	0	0	0	0	0		0	0	0	61
2 µM								0		15
5 µM			0	0	0	0	0	0	0	51
10 µM	80	100	33.3333	0	0	50	0	0	0	69
20 µM			100	50	83.3333	100		20		39
100 µM	100									8
1 mM		100								8
Glyoxal
Dose	Survival after 24h					Total N/dose
1 µM	0					10
10 µM	0		0	0	0	31
20 µM			0	0	0	21
50 µM			0	25	0	21
100 µM	100		66.6667	36.8421	85.7143	36
1 mM		100				6
10 mM		100				7
Glyoxal trimer
Dose	Survival after 24h					Total N/dose
500 nM			0	0	0	15
1 µM	0		0	0	0	23
5 µM			0	0	0	15
10 µM	100		0	0	0	23
100 µM	100	100				15
1 mM		100				6
10 mM		100				6
Pyruvate
Dose	Survival after 24h					Total N/dose
1 µM	0					7
10 µM	0					6
20 µM				0	0	12
50 µM			0	0	0	15
100 µM	0		100	0	0	21
200 µM			100	0	66.6667	15
1 mM	100					8
10 mM	100	100				13
a-Ketoglutarate
Dose	Survival after 24h						Total N/dose
1 µM	0						7
5 µM				0	0	0	15
10 µM	0			0	0	0	22
20 µM				0	0	0	15
50 µM				0	0	0	15
100 µM	0						7
250 µM			0				3
500 µM			100				3
1 mM	100		100				10
10 mM	100	100					13
(±)-3-Methyl-2-oxovaleric acid sodium salt
Dose	Survival after 24h					Total N/dose
50 µM		0	0	0		15
100 µM	0	0	0	0		21
200 µM		33.3333	0	0		15
500 µM	100	66.6667	0	0		24
2 mM	100					9
5 mM					100	3
10 mM					100	3
Dihydroxyacetone
Dose	Survival after 24h					Total N/dose
100 µM		0	0	0	0	21
200 µM		0	0	0	0	21
500 µM	0	0	0	0	0	24
1 mM	0	0	100	100	0	24
2 mM	100					3
Sodium dichloroacetate
Dose	Survival after 24h								Total N/dose
1 mM				0					6
5 mM					0	0	0	0	21
10 mM	0			50	0	0	0	0	33
20 mM		100			0	0	0	0	28
25 mM	100		100						12
50 mM	100	100	100						18
100 mM	100			100					12
